# Supplementary material for: Molecular engineering of a polyimide copolymer enables excellent dielectric and energy storage performance
Source: Royal Society of Chemistry journal article supplement (doi:10.1039/d3nj01125a), 2023-01-01
Supplement: d3nj01125a1.pdf [file d3nj01125a1.pdf]

## Electronic Supplementary Information

### **Molecular engineering of polyimide copolymer enables excellent dielectric and energy storage performance**

Xuehui Peng,<sup>a</sup> Huiping Liu,<sup>a</sup> Zewei Zhu,<sup>a</sup> Tao Xu,<sup>a</sup> Gangyong Zhou,<sup>\*b</sup> Wei Zhou,<sup>a</sup> Ju Bai,<sup>a</sup>

Haoqing Hou<sup>a</sup> and Xinwen Peng<sup>\*a</sup>

<sup>a</sup> *College of Chemistry and Chemical Engineering, Nanofiber Engineering Center of Jiangxi Province, Jiangxi Normal University, Nanchang, Jiangxi 330022, PR China.*

<sup>b</sup> *Key Laboratory of Coordination Chemistry of Jiangxi Province, School of Chemistry and Chemical Engineering, Jinggangshan University, Ji'an, Jiangxi 343009, China.*

## **Experimental section**

### **Materials**

3,3',4,4'-biphenyltetracarboxylic dianhydride (BPDA), 4,4'-Oxydianiline (ODA), 5,10,15,20-tetraphenylporphyrin (TPP) and trifluoroacetic acid (TFA) were purchased from J&K Chemical Ltd. Sodium nitrite ( $\text{NaNO}_2$ ), stannous chloride ( $\text{SnCl}_2$ ) and tetrahydrofuran (THF) were provided by Aladdin. Zinc acetylacetonate (ZAA) was purchased from Beijing Jinming Biotechnology Co., Ltd, Beijing, China. All other chemicals and solvents were obtained from Tianjin Zhi Yuan chemical reagents, LTD, Tianjin, China. N, N-dimethylformamide (DMF) was purified with  $\text{CaH}_2$  and vacuum distilled, and then stored in the presence of 4 Å molecular sieves.

### **Synthesis of TPP-2NH<sub>2</sub>**

TPP (0.6g, 0.001mol) and  $\text{NaNO}_2$  (0.55 g, 0.008 mol) were completely dissolved in 25 mL TFA under nitrogen atmosphere, and magnetically stirred at room temperature for 0.5 h to obtain homogeneous solution. After reaction of 0.5 h, 100 mL of deionized water has been added to stop the reaction and then extracted with dichloromethane and dried. The obtained powder and  $\text{SnCl}_2$  (1.6 g, 0.007 mol) were added to 80 ml of concentrated hydrochloric acid under nitrogen atmosphere with 65 °C and magnetically stirred for 3 h. Subsequently, ammonia water was added to the solution until the pH reached 8~9. Then the powder was filtered, washed and dried. Finally, the tetraphenylporphyrin diamine (TPP-2NH<sub>2</sub>) was obtained via column chromatography on silica gel with methanol/dichloromethane (1:100, v/v) as the eluent.

### **Synthesis of ZnTPP-2NH<sub>2</sub>**

The obtained TPP-2NH<sub>2</sub> (200 mg, 0.31 mmol) was dissolved in 60 mL of THF solution, and then ZAA (400 mg, 1.52 mmol) was added into above solution and heated to reflux for 3 h. Subsequently, the organic solvent was removed through rotary evaporation to obtain powder. Finally, the powder was dissolved in methanol overnight at low temperature, and then filtered, washed and dried to obtain zinc tetraphenylporphyrin diamine (ZnTPP-2NH<sub>2</sub>). The synthetic route of ZnTPP-2NH<sub>2</sub> is shown in Figure 1A.

### **Preparation of the ZnTPP-PI film**

The ZnTPP-PI film was prepared by the following two steps (Figure 1B). First, ODA (56.1 mg, 0.28 mmol) was completely dissolved in 3.0 g DMF. Then BPDA (164.4 mg, 0.56 mmol) was added into the DMF solution under strong mechanical stirring at 0 °C in N<sub>2</sub> atmosphere for 2 h to obtain homogeneous solution. Subsequently, ZnTPP-2NH<sub>2</sub> with the same molar ratio as ODA was added into above solution under strong mechanical stirring at 60 °C in N<sub>2</sub> atmosphere for 2 h to obtain the polyamic acid (PAA) solution. After that, the obtained PAA solution was coated on glass plate and dried as well as followed with imidization at 350 °C under N<sub>2</sub> atmosphere to obtain the ZnTPP-PI film. For comparison, the ZnTPP-PI film with different amounts of ZnTPP-2NH<sub>2</sub> was also prepared via the same operation processes, respectively, which were named as ZnTPP-PI-0, ZnTPP-PI-10, ZnTPP-PI-30, ZnTPP-PI-50 and ZnTPP-PI-70 according to the different contents of ZnTPP-2NH<sub>2</sub>, respectively.

### **Characterizations**

Chemical compositions and structures of different samples were characterized via

nuclear magnetic resonance (NMR, Bruker AVANCE 400) and Fourier transform infrared (FTIR, Bruker tensor-27). The dielectric properties of different ZnTPP-PI films were analysed by a TH-2819A precision LCR meter (Tong Hui Electronic Co., Ltd.) from  $10^2$  to  $10^5$  Hz at ambient temperature. The breakdown strength of different ZnTPP-PI films with  $20 \times 20$  mm in size and thickness of  $25 \mu\text{m}$  was tested using an electric breakdown strength test machine (DDJ-20 kV, China) under DC high-voltage power. The tensile test of different ZnTPP-PI films was characterized by SANS CMT8012 (Shenzhen, China) instrument. Thermal stability of different ZnTPP-PI films was measured by thermogravimetric analyzer (TGA, WRT-3P, China) with a temperature ramp of  $10 \text{ }^\circ\text{C min}^{-1}$  under  $\text{N}_2$  atmosphere.

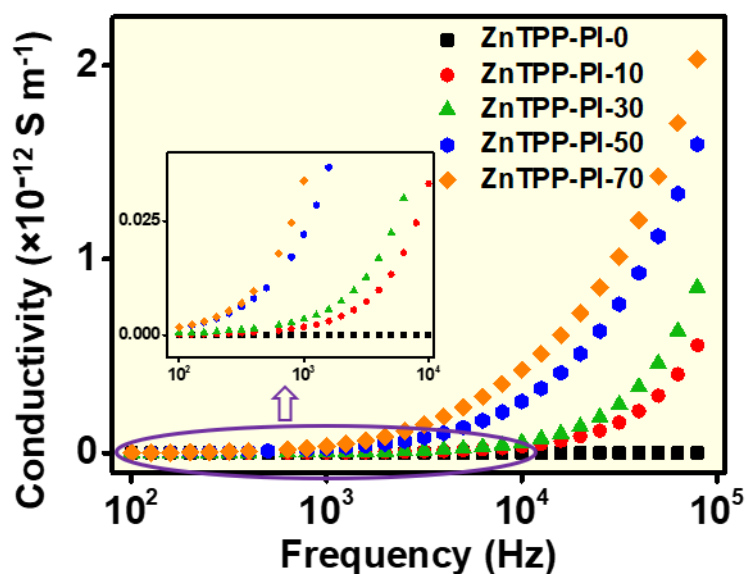

**Fig. S1** Conductivity of different ZnTPP-PI films.

**Table 1** Thermal stability of the different ZnTPP-PI films

| Different ZnTPP-PI films | 5% weight-loss temperature (°C) | 10% weight-loss temperature (°C) | Char yield of 800 °C [%] |
|--------------------------|---------------------------------|----------------------------------|--------------------------|
| ZnTPP-PI-0               | 550                             | 570                              | 57.6                     |
| ZnTPP-PI-10              | 548                             | 567                              | 59.0                     |
| ZnTPP-PI-30              | 540                             | 562                              | 61.4                     |
| ZnTPP-PI-50              | 537                             | 556                              | 62.3                     |
